# Supplementary material
Source: PubMed Central journal article supplement (PMC3071018)
Supplement: NIHMS272988-supplement-Supp1.pdf [file NIHMS272988-supplement-Supp1.pdf]

## **SUPPLEMENTAL MATERIAL**

Movie Legend: Movie of the mitral annular model derived from automatic point tracking of manually selected annular points at end diastole. Each marker represents a point on the annulus that was visible in a long-axis magnetic resonance image (red – saddle horn, blue – anterior commissure, green – posterior commissure, orange – cantle).
